# Supplementary material
Source: PubMed Central journal article supplement (PMC2728687)
Supplement: NIHMS86451-supplement-1_si_001.pdf [file NIHMS86451-supplement-1_si_001.pdf]

Supplementary Information for:

One and Two Metal Ion Catalysis: Global Single  
Turnover Kinetic Analysis of PvuII Endonuclease  
Mechanism<sup>†</sup>

Fuqian Xie, Shabir H. Qureshi, Grigorios A. Papadakos, and  
Cynthia M. Dupureur\*

Department of Chemistry & Biochemistry and the Center for  
Nanoscience, University of Missouri St. Louis,  
St. Louis, MO 63121

**Table S1. Measured Dissociation Rate Constants for DNA Binding to PvuII Endonuclease.<sup>a</sup>**

| <b>Metal Ion/Concentration</b> | <b>Rate constant (s<sup>-1</sup>)</b> | <b>Technique</b>        |
|--------------------------------|---------------------------------------|-------------------------|
| Metal free                     | 3.4e-3                                | Fluorescence anisotropy |
| 10 mM Ca(II)                   | 3.9e-4                                | Fluorescence anisotropy |
| 0.3 mM Ca(II)                  | 1.13e-3                               | Fluorescence anisotropy |
| 1 mM Mg(II)                    | 1.8e-3                                | DNA cleavage trap       |
| 0.3 mM Mg(II)                  | 4.0e-4                                | DNA cleavage trap       |

<sup>a</sup>Data taken from Ref. (1).

**Table S2. Dissociation Rate Constants ( $k_{\text{off}}$ ) for Metal Ion Binding.**

| <b>Protein</b>                | <b>Metal ion</b> | <b><math>k_{\text{off}}</math> (<math>\text{s}^{-1}</math>)</b> |
|-------------------------------|------------------|-----------------------------------------------------------------|
| Calmodulin <sup>a</sup>       | Mg(II)           | 2700, 6600                                                      |
| Phospholipase A2 <sup>b</sup> | Ca(II)           | 1000                                                            |
| proPLA2 <sup>b</sup>          | Ca(II)           | 3000                                                            |
| Troponin C <sup>c</sup>       | Ca(II)           | 600                                                             |
| Troponin C <sup>d</sup>       | Mg(II)           | >230                                                            |
| Parvalbumin <sup>e</sup>      | Ca(II)           | >3e5                                                            |

<sup>a</sup>Ref. (2). <sup>b</sup>(3, 4). <sup>c</sup>(5). <sup>d</sup>(6). <sup>e</sup>(7)

**Table S3.** Summary of Kinetic Parameters from Single Turnover Studies<sup>a</sup>

| Parameter | Value                               | Source               |
|-----------|-------------------------------------|----------------------|
| $k_0$     | $3.3e3 \text{ M}^{-1}\text{s}^{-1}$ | ( <i>I</i> )         |
| $k_{-0}$  | $0.001 \text{ s}^{-1}$              | ( <i>I</i> )         |
| $K_0$     | 300 nM                              | ( <i>I</i> )         |
| $k_1$     | $4.7e7 \text{ M}^{-2}\text{s}^{-1}$ | This study           |
| $k_{-1}$  | $1000 \text{ s}^{-1}$               | Table S2, this study |
| $K_1$     | 4.6 mM                              | This study           |
| $k_2$     | $3.7e4 \text{ M}^{-1}\text{s}^{-1}$ | This study           |
| $k_{-2}$  | $0.001 \text{ s}^{-1}$              | ( <i>I</i> )         |
| $K_2$     | 27 nM                               | This study           |
| $k_3$     | $1.1e8 \text{ M}^{-2}\text{s}^{-1}$ | This study           |
| $k_{-3}$  | $1000 \text{ s}^{-1}$               | Table S2, this study |
| $K_3$     | 3.1 mM                              | This study           |
| $k_3'$    | $7.7e7 \text{ M}^{-2}\text{s}^{-1}$ | This study           |
| $k_{-3}'$ | $190 \text{ s}^{-1}$                | This study           |
| $K_3'$    | 1.6 mM                              | This study           |
| $k_4$     | $2e5 \text{ M}^{-1}\text{s}^{-1}$   | This study           |
| $k_{-4}$  | $0.001 \text{ s}^{-1}$              | ( <i>I</i> )         |
| $K_4$     | 5 nM                                | This study           |
| $k_5$     | $1.1 \text{ s}^{-1}$                | This study           |
| $k_6$     | $0.011 \text{ s}^{-1}$              | This study           |

<sup>a</sup>See **Fig. 6** and **Fig. 8** for definitions of parameters.

## REFERENCES

1. Conlan, L. H., and Dupureur, C. M. (2002) Multiple metal ions drive DNA association by *PvuII* endonuclease. *Biochemistry* 41, 14848-14855.
2. Tsai, M.-D., Drakenberg, T., Thulin, E., and Forsen, S. (1987) Is the binding of magnesium (II) to calmodulin significant? An investigation by magnesium-25 nuclear magnetic resonance. *Biochemistry* 26, 3635-3643.
3. Andersson, T., Drakenberg, T., Forsen, S., Wieloch, T., and Lindstrom, M. (1981) Calcium binding to porcine pancreatic phospholipase A2 studied by <sup>43</sup>Ca NMR. *FEBS Lett* 123, 115-7.
4. Drakenberg, T., Andersson, T., Forsen, S., and Wieloch, T. (1984) Calcium ion binding to pancreatic phospholipase A2 and its zymogen: a <sup>43</sup>Ca NMR study. *Biochemistry* 23, 2387-92.
5. Braunlin, W., Drakenberg, T., and Forsen, S. (1985) Metal Ion NMR: Application to Biological Systems. *Curr Top Bioenerg.* 14, 97.
6. Forsen, S., Andersson, T., Drakenberg, T., Teleman, O., Thulin, E., and HJ, V. (1983) *Calcium Binding Proteins*, Elsevier, Amsterdam.
7. Andersson, T., Drakenberg, T., Forsen, S., Thulin, E., and Sward, M. (1982) Direct Observation of the Calcium-43 NMR Signals from Ca<sup>2+</sup> Ions Bound to Proteins. *J Amer Chem Soc* 104, 576-580.
8. Xie, F., Quresihi, S., Papadakos, G. A., and Dupureur, C. M. (2008) One and Two Metal Ion Catalysis: Global Single Turnover Kinetic Analysis of *PvuII* Endonuclease Mechanism. *Biochemistry submitted*.
